# Supplementary material for: Analysis of Volatile Aroma Components in Different Parts of Shiitake Mushroom (Lentinus edodes) Treated with Ultraviolet C Light-Emitting Diodes Based on Gas Chromatography–Ion Mobility Spectroscopy
Source: MDPI journal article supplement (doi:10.3390/molecules29081872), 2024-04-19
Supplement: s1 [file s1]

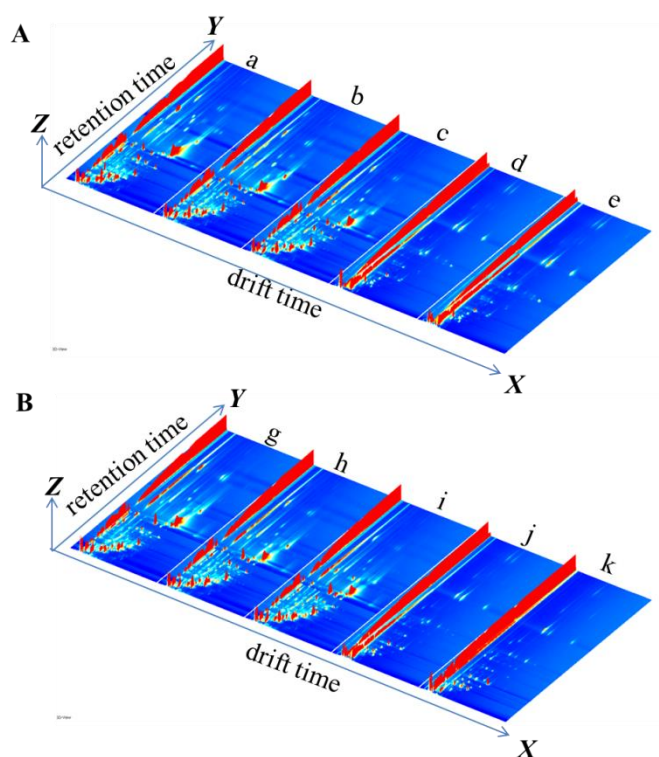

**Figure S1.** 3D-topographic plots for various parts of shiitake mushroom samples treated with UVC-LED.

A: Shiitake mushroom caps treatment samples. Lowercase letters a-e represent C-CK, CF-30, CF-120, CS-30, and CS-120, respectively; B: Shiitake mushroom stems treatment samples.

Lowercase letters g-k represent C-CK, CF-30, CF-120, CS-30, and CS-120, respectively.

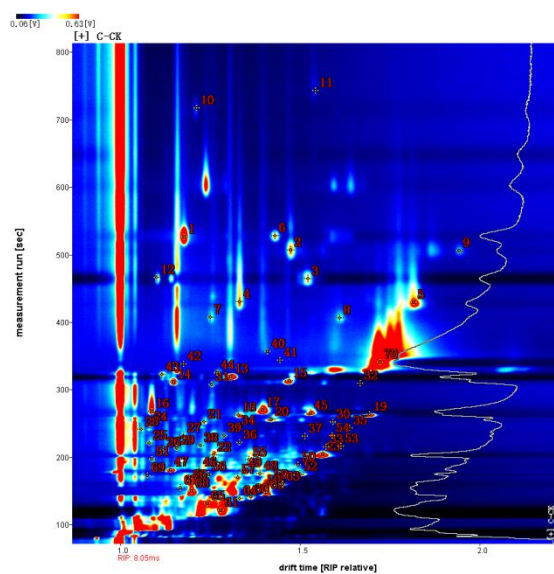

**Figure S2.** GC-IMS characterization of volatile components in fresh shiitake mushroom caps.

**Table S1.** Volatile compounds in shiitake mushrooms identified by GC-IMS.

| No            | Compounds               | CAS#       | Formula                                      | M <sub>w</sub> | RI     | t <sub>R</sub> (s) | Dt [a.u.] | Comment |
|---------------|-------------------------|------------|----------------------------------------------|----------------|--------|--------------------|-----------|---------|
| Alcohols(13)  |                         |            |                                              |                |        |                    |           |         |
| 10            | (-)-Myrtenol            | 19894-97-4 | C <sub>10</sub> H <sub>16</sub> O            | 152.2          | 1254.7 | 717.29             | 1.21511   |         |
| 34            | n-Hexanol-M             | 111-27-3   | C <sub>6</sub> H <sub>14</sub> O             | 102.2          | 866.9  | 243.386            | 1.32884   | Monomer |
| 35            | n-Hexanol-D             | 111-27-3   | C <sub>6</sub> H <sub>14</sub> O             | 102.2          | 866.9  | 243.386            | 1.64073   | Dimer   |
| 39            | 2-Methyl-1-pentanol-M   | 105-30-6   | C <sub>6</sub> H <sub>14</sub> O             | 102.2          | 846.2  | 232.268            | 1.29126   | Monomer |
| 54            | 2-Methyl-1-pentanol-D   | 105-30-6   | C <sub>6</sub> H <sub>14</sub> O             | 102.2          | 845.5  | 231.88             | 1.59225   | Dimer   |
| 50            | Pentan-1-ol             | 71-41-0    | C <sub>5</sub> H <sub>12</sub> O             | 88.1           | 758    | 188.454            | 1.49677   |         |
| 52            | 3-Methylbutan-1-ol-D    | 123-51-3   | C <sub>5</sub> H <sub>12</sub> O             | 88.1           | 724    | 174.645            | 1.50244   | Dimer   |
| 56            | 3-Methylbutan-1-ol-M    | 123-51-3   | C <sub>5</sub> H <sub>12</sub> O             | 88.1           | 724.4  | 174.796            | 1.24763   | Monomer |
| 58            | 3-Pentanol-D            | 584-02-1   | C <sub>5</sub> H <sub>12</sub> O             | 88.1           | 695.8  | 163.215            | 1.42007   | Dimer   |
| 66            | 3-Pentanol-M            | 584-02-1   | C <sub>5</sub> H <sub>12</sub> O             | 88.1           | 693.9  | 162.436            | 1.19391   | Monomer |
| 60            | 1-Propanethiol          | 107-03-9   | C <sub>3</sub> H <sub>8</sub> S              | 76.2           | 621    | 142.063            | 1.36537   |         |
| 63            | Pentan-2-ol             | 6032-29-7  | C <sub>5</sub> H <sub>12</sub> O             | 88.1           | 686.4  | 159.706            | 1.45384   |         |
| 70            | 1-Octen-3-ol            | 3391-86-4  | C <sub>8</sub> H <sub>16</sub> O             | 128.2          | 990.8  | 341.054            | 1.7244    |         |
| Aldehydes(28) |                         |            |                                              |                |        |                    |           |         |
| 2             | Nonanal-M               | 124-19-6   | C <sub>9</sub> H <sub>18</sub> O             | 142.2          | 1108.3 | 506.763            | 1.47589   | Monomer |
| 9             | Nonanal-D               | 124-19-6   | C <sub>9</sub> H <sub>18</sub> O             | 142.2          | 1108   | 506.287            | 1.94515   | Dimer   |
| 4             | <i>E</i> -2-octenal-M   | 2548-87-0  | C <sub>8</sub> H <sub>14</sub> O             | 126.2          | 1055.5 | 430.759            | 1.33448   | Monomer |
| 5             | <i>E</i> -2-octenal-D   | 2548-87-0  | C <sub>8</sub> H <sub>14</sub> O             | 126.2          | 1054.8 | 429.745            | 1.81812   | Dimer   |
| 7             | Benzene acetaldehyde    | 122-78-1   | C <sub>8</sub> H <sub>8</sub> O              | 120.2          | 1039.3 | 407.441            | 1.25337   |         |
| 11            | Decanal                 | 112-31-2   | C <sub>10</sub> H <sub>20</sub> O            | 156.3          | 1272.9 | 743.387            | 1.54487   |         |
| 14            | Benzaldehyde-M          | 100-52-7   | C <sub>7</sub> H <sub>6</sub> O              | 106.1          | 956.3  | 311.654            | 1.15082   | Monomer |
| 15            | Benzaldehyde-D          | 100-52-7   | C <sub>7</sub> H <sub>6</sub> O              | 106.1          | 957.7  | 312.861            | 1.47298   | Dimer   |
| 16            | 3-Methylthiopropenal-M  | 3268-49-3  | C <sub>4</sub> H <sub>8</sub> OS             | 104.2          | 904.8  | 267.688            | 1.09006   | Monomer |
| 17            | 3-Methylthiopropenal-D  | 3268-49-3  | C <sub>4</sub> H <sub>8</sub> OS             | 104.2          | 907.1  | 269.621            | 1.39809   | Dimer   |
| 18            | Heptanal-M              | 111-71-7   | C <sub>7</sub> H <sub>14</sub> O             | 114.2          | 898.9  | 262.616            | 1.33168   | Monomer |
| 19            | Heptanal-D              | 111-71-7   | C <sub>7</sub> H <sub>14</sub> O             | 114.2          | 899.7  | 263.34             | 1.69624   | Dimer   |
| 22            | Hexanal-M               | 66-25-1    | C <sub>6</sub> H <sub>12</sub> O             | 100.2          | 792.2  | 203.362            | 1.26245   | Monomer |
| 23            | Hexanal-D               | 66-25-1    | C <sub>6</sub> H <sub>12</sub> O             | 100.2          | 795    | 204.844            | 1.56557   | Dimer   |
| 25            | Furfural-M              | 98-01-1    | C <sub>5</sub> H <sub>4</sub> O <sub>2</sub> | 96.1           | 825.8  | 221.336            | 1.08459   | Monomer |
| 36            | Furfural-D              | 98-01-1    | C <sub>5</sub> H <sub>4</sub> O <sub>2</sub> | 96.1           | 827.5  | 222.262            | 1.3351    | Dimer   |
| 27            | <i>E</i> -2-hexenal-M   | 6728-26-3  | C <sub>6</sub> H <sub>10</sub> O             | 98.1           | 845.8  | 232.083            | 1.17853   | Monomer |
| 37            | <i>E</i> -2-hexenal-D   | 6728-26-3  | C <sub>6</sub> H <sub>10</sub> O             | 98.1           | 844.8  | 231.527            | 1.51672   | Dimer   |
| 31            | <i>E</i> -hept-2-enal-M | 18829-55-5 | C <sub>7</sub> H <sub>12</sub> O             | 112.2          | 951.5  | 307.499            | 1.25744   | Monomer |
| 32            | <i>E</i> -hept-2-enal-D | 18829-55-5 | C <sub>7</sub> H <sub>12</sub> O             | 112.2          | 953.9  | 309.538            | 1.66954   | Dimer   |
| 40            | Octanal                 | 124-13-0   | C <sub>8</sub> H <sub>16</sub> O             | 128.2          | 1003.8 | 356.427            | 1.41261   |         |
| 51            | 3-Methyl-2-butenal-M    | 107-86-8   | C <sub>5</sub> H <sub>8</sub> O              | 84.1           | 779.4  | 197.106            | 1.09028   | Monomer |
| 55            | 3-Methyl-2-butenal-D    | 107-86-8   | C <sub>5</sub> H <sub>8</sub> O              | 84.1           | 777.3  | 196.254            | 1.35993   | Dimer   |
| 59            | 2-Methylbutanal-D       | 96-17-3    | C <sub>5</sub> H <sub>10</sub> O             | 86.1           | 668.7  | 154.927            | 1.40033   | Dimer   |
| 67            | 2-Methylbutanal-M       | 96-17-3    | C <sub>5</sub> H <sub>10</sub> O             | 86.1           | 666.2  | 154.245            | 1.17097   | Monomer |
| 61            | Butanal                 | 123-72-8   | C <sub>4</sub> H <sub>8</sub> O              | 72.1           | 543.9  | 121.269            | 1.28346   |         |

|            |                            |              |                                               |       |        |         |         |         |
|------------|----------------------------|--------------|-----------------------------------------------|-------|--------|---------|---------|---------|
| 62         | 3-Methylbutanal-D          | 590-86-3     | C <sub>5</sub> H <sub>10</sub> O              | 86.1  | 642    | 147.734 | 1.41015 | Dimer   |
| 68         | 3-Methylbutanal-M          | 590-86-3     | C <sub>5</sub> H <sub>10</sub> O              | 86.1  | 649    | 149.624 | 1.20155 | Monomer |
| Ketones(7) |                            |              |                                               |       |        |         |         |         |
| 26         | 4-Methyl-3-penten-2-one,   | 141-79-7     | C <sub>6</sub> H <sub>10</sub> O              | 98.1  | 805.4  | 210.403 | 1.12217 |         |
| 42         | Methyl-5-hepten-2-one      | 110-93-0     | C <sub>8</sub> H <sub>14</sub> O              | 126.2 | 987.6  | 338.34  | 1.17964 |         |
| 44         | 1-Octen-3-one              | 4312-99-6    | C <sub>8</sub> H <sub>14</sub> O              | 126.2 | 972.7  | 325.636 | 1.27176 |         |
| 49         | <i>E</i> -3-penten-2-one   | 3102-33-8    | C <sub>5</sub> H <sub>8</sub> O               | 84.1  | 738.4  | 180.468 | 1.34647 |         |
| 57         | 3-Hydroxybutan-2-one       | 513-86-0     | C <sub>4</sub> H <sub>8</sub> O <sub>2</sub>  | 88.1  | 712.9  | 170.137 | 1.32958 |         |
| 65         | 2-Butanone                 | 78-93-3      | C <sub>4</sub> H <sub>8</sub> O               | 72.1  | 582.9  | 131.771 | 1.24524 |         |
| 69         | 1-Penten-3-one             | 1629-58-9    | C <sub>5</sub> H <sub>8</sub> O               | 84.1  | 720.3  | 173.148 | 1.07814 |         |
| Acids(2)   |                            |              |                                               |       |        |         |         |         |
| 21         | Pentanoic acid             | 109-52-4     | C <sub>5</sub> H <sub>10</sub> O <sub>2</sub> | 102.1 | 884.3  | 252.711 | 1.2356  |         |
| 29         | Butanoic acid              | 107-92-6     | C <sub>4</sub> H <sub>8</sub> O <sub>2</sub>  | 88.1  | 811.9  | 213.924 | 1.15974 |         |
| Ester(5)   |                            |              |                                               |       |        |         |         |         |
| 1          | Tetrahydrofurfuryl acetate | 637-64-9     | C <sub>7</sub> H <sub>12</sub> O <sub>3</sub> | 144.2 | 1122.1 | 526.57  | 1.18018 |         |
| 6          | Hexyl propanoate           | 2445763      | C <sub>9</sub> H <sub>18</sub> O <sub>2</sub> | 158.2 | 1123.5 | 528.591 | 1.43243 |         |
| 38         | Butyl acetate-M            | 123-86-4     | C <sub>6</sub> H <sub>12</sub> O <sub>2</sub> | 116.2 | 818.2  | 217.259 | 1.22488 | Monomer |
| 53         | Butyl acetate-D            | 123-86-4     | C <sub>6</sub> H <sub>12</sub> O <sub>2</sub> | 116.2 | 815.9  | 216.074 | 1.61683 | Dimer   |
| 64         | Ethyl Acetate              | 141-78-6     | C <sub>4</sub> H <sub>8</sub> O <sub>2</sub>  | 88.1  | 609.3  | 138.912 | 1.3337  |         |
| Others(8)  |                            |              |                                               |       |        |         |         |         |
| 12         | 2-Acetylpyrrole            | 1072-83-9    | C <sub>6</sub> H <sub>7</sub> NO              | 109.1 | 1080.3 | 466.389 | 1.10397 |         |
| 13         | Dimethyl trisulfide        | 3658-80-8    | C <sub>2</sub> H <sub>6</sub> S <sub>3</sub>  | 126.3 | 965.3  | 319.324 | 1.30946 |         |
| 20         | Styrene                    | 100-42-5     | C <sub>8</sub> H <sub>8</sub>                 | 104.2 | 890.2  | 255.852 | 1.42212 |         |
| 24         | 2,6-Dimethylpyridine       | 108-48-5     | C <sub>7</sub> H <sub>9</sub> N               | 107.2 | 877    | 248.76  | 1.08584 |         |
| 28         | <i>P</i> -xylene           | 106-42-3     | C <sub>8</sub> H <sub>10</sub>                | 106.2 | 862.8  | 241.163 | 1.06204 |         |
| 43         | 3-Ethylpyridine            | 536-78-7     | C <sub>7</sub> H <sub>9</sub> N               | 107.2 | 969    | 322.476 | 1.11873 |         |
| 47         | Dimethyl disulfide         | 624-92-0     | C <sub>2</sub> H <sub>6</sub> S <sub>2</sub>  | 94.2  | 740    | 181.134 | 1.14228 |         |
| 48         | Methanedithiol             | 6725-64-0    | CH <sub>4</sub> S <sub>2</sub>                | 80.2  | 727.7  | 176.142 | 1.3909  |         |
| Unknown(7) |                            |              |                                               |       |        |         |         |         |
| 3          | Unknown-1                  | unidentified | *                                             | 0     | 1078.8 | 464.214 | 1.52426 |         |
| 8          | Unknown-2                  | unidentified | *                                             | 0     | 1038.6 | 406.428 | 1.61303 |         |
| 30         | Unknown-3                  | unidentified | *                                             | 0     | 883.9  | 252.466 | 1.59313 |         |
| 33         | Unknown-4                  | unidentified | *                                             | 0     | 815.4  | 215.777 | 1.57434 |         |
| 41         | Unknown-5                  | unidentified | *                                             | 0     | 993.7  | 343.551 | 1.44738 |         |
| 45         | Unknown-6                  | unidentified | *                                             | 0     | 902.1  | 265.349 | 1.53198 |         |
| 46         | Unknown-7                  | unidentified | *                                             | 0     | 740.8  | 181.466 | 1.22168 |         |

M<sub>w</sub>: The molecular weight of the identified compound. RI: The retention index was calculated using n-ketones

C4-C9 as the external standard; t<sub>R</sub>: The retention time in the capillary GC column; Dt: The drift time in the drift tube.



|    |                                 |                      |                         |                         |                     |                         |                     |                   |                   |                       |                        |
|----|---------------------------------|----------------------|-------------------------|-------------------------|---------------------|-------------------------|---------------------|-------------------|-------------------|-----------------------|------------------------|
| 15 | Benzaldehy<br>de-D              | 1309.61±<br>201.87e  | 5967.98<br>±89.55b      | 2769.03<br>±267.23<br>d | 5911.48±<br>252.61b | 3537.58<br>±370.12<br>c | 7826.78±<br>305.84a | 63.54±<br>11.97f  | 65.07±<br>8.52f   | 86.55±<br>10.32f      | 97.19±<br>12.23f       |
| 16 | 3-methylthi<br>opropanal-<br>M  | 2060.40±<br>54.81a   | 1862.86<br>±85.26b<br>c | 1811.65<br>±33.68c<br>d | 1971.21±<br>66.82ab | 1701.54<br>±19.39d      | 1504.86±<br>14.04e  | 185.45<br>±16.36f | 201.80<br>±11.49f | 142.08<br>±6.67f      | 88.64±<br>8.94f        |
| 17 | 3-methylthi<br>opropanal-<br>D  | 2391.70±<br>204.38ab | 1389.96<br>±172.01<br>d | 1878.13<br>±134.58<br>c | 2624.71±<br>272.39a | 2172.21<br>±44.37b<br>c | 1867.35±<br>194.27c | 90.70±<br>8.32e   | 118.42<br>±4.88e  | 88.21±<br>4.90e       | 69.85±<br>12.03e       |
| 18 | Heptanal-M                      | 538.02±2<br>5.97bc   | 497.75±<br>6.49c        | 584.33±<br>31.76ab      | 569.29±1<br>2.55b   | 629.38±<br>18.00a       | 541.30±1<br>7.20bc  | 83.13±<br>2.44e   | 82.05±<br>3.74e   | 89.25±<br>2.92e       | 255.95<br>±25.39<br>d  |
| 19 | Heptanal-D                      | 690.93±7<br>6.69ab   | 466.91±<br>27.29b       | 625.21±<br>158.82a<br>b | 745.46±3<br>0.19a   | 718.12±<br>76.75ab      | 870.98±1<br>70.07a  | 41.27±<br>8.12c   | 66.50±<br>4.50c   | 33.41±<br>1.56c       | 70.78±<br>6.96c        |
| 20 | Styrene                         | 420.30±2<br>2.33b    | 615.44±<br>6.96a        | 277.23±<br>7.73d        | 370.65±1<br>0.91c   | 255.50±<br>11.94d       | 432.15±5<br>.56b    | 23.36±<br>3.87e   | 29.38±<br>2.59e   | 24.78±<br>4.86e       | 19.34±<br>3.89e        |
| 21 | pentanoic<br>acid               | 204.76±6<br>.90b     | 288.42±<br>2.33a        | 233.89±<br>10.74b       | 228.16±6<br>.69b    | 160.93±<br>1.18c        | 207.36±2<br>9.44b   | 14.24±<br>2.90d   | 14.11±<br>3.46d   | 13.53±<br>2.37d       | 24.58±<br>4.61d        |
| 22 | Hexanal-M                       | 618.48±2<br>5.93c    | 737.40±<br>4.53b        | 709.01±<br>17.57b       | 702.42±5<br>.88b    | 698.98±<br>25.77b       | 593.26±2<br>4.45c   | 228.17<br>±6.00e  | 190.49<br>±4.53e  | 335.94<br>±0.84d      | 978.51<br>±30.60<br>a  |
| 23 | Hexanal-D                       | 2452.06±<br>73.18e   | 2889.71<br>±74.46d      | 3268.57<br>±144.72<br>c | 3971.58±<br>24.78ab | 3709.24<br>±110.91<br>b | 4103.04±<br>178.64a | 366.11<br>±7.92h  | 315.11<br>±8.66h  | 729.43<br>±30.78<br>g | 2032.3<br>7±86.8<br>4f |
| 24 | 2,6-Dimeth<br>ylpyridine        | 64.64±5.<br>38e      | 463.89±<br>7.79a        | 138.36±<br>2.93d        | 308.28±8<br>.41b    | 74.94±7.<br>02e         | 242.34±4<br>.52c    | 16.54±<br>0.57f   | 15.58±<br>0.87f   | 16.35±<br>0.94f       | 7.63±1.<br>86f         |
| 25 | Furfural-M                      | 100.72±1<br>3.37c    | 120.93±<br>14.26c       | 101.73±<br>19.38c       | 261.37±3<br>1.57b   | 88.32±6.<br>84c         | 321.28±2<br>7.19a   | 24.37±<br>0.39d   | 21.62±<br>0.29d   | 23.06±<br>1.10d       | 19.52±<br>1.70d        |
| 26 | 4-Methyl-3-<br>penten-2-on<br>e | 61.40±6.<br>00d      | 24.26±0.<br>97e         | 18.09±1.<br>79ef        | 11.07±1.<br>46f     | 13.40±1.<br>18f         | 7.83±0.4<br>5f      | 379.84<br>±2.46b  | 397.15<br>±2.11a  | 308.27<br>±5.17c      | 52.42±<br>6.00d        |
| 27 | (E)-2-hexe<br>nal-M             | 121.29±1<br>1.45d    | 152.87±<br>7.28d        | 189.95±<br>8.20c        | 249.37±1<br>.48ab   | 229.84±<br>9.64b        | 262.47±2<br>5.82a   | 35.91±<br>1.64e   | 41.70±<br>2.49e   | 40.69±<br>1.39e       | 128.48<br>±7.16d       |
| 28 | p-Xylene                        | 57.92±5.<br>80b      | 70.89±3.<br>02a         | 43.00±0.<br>93c         | 49.43±0.<br>91c     | 42.25±2.<br>67c         | 61.89±1.<br>80b     | 14.94±<br>1.51de  | 10.04±<br>0.80e   | 18.44±<br>1.70d       | 16.39±<br>1.48de       |
| 29 | Butanoic<br>acid                | 34.27±8.<br>30cd     | 38.68±7.<br>69cd        | 47.61±3.<br>26bc        | 53.58±1.<br>87b     | 40.60±2.<br>31bcd       | 45.68±6.<br>32bc    | 46.42±<br>2.98bc  | 69.20±<br>1.41a   | 30.17±<br>0.82d       | 7.32±1.<br>04e         |
| 30 | Unknown-3                       | 52.04±3.<br>80e      | 172.83±<br>14.85b       | 97.40±8.<br>16d         | 144.73±1<br>.52c    | 90.22±9.<br>99d         | 216.38±1<br>1.58a   | 13.80±<br>2.66f   | 12.83±<br>2.09f   | 13.87±<br>3.02f       | 13.99±<br>4.53f        |
| 31 | (E)-hept-2-e<br>nal-M           | 142.41±1<br>3.90de   | 178.22±<br>11.24c       | 319.63±<br>17.83a       | 245.20±5<br>.30b    | 351.39±<br>14.15a       | 273.04±1<br>5.24b   | 107.15<br>±2.01f  | 113.12<br>±1.94ef | 163.73<br>±1.72c<br>d | 325.56<br>±8.09a       |
| 33 | (E)-hept-2-e                    | 46.13±4.             | 103.62±                 | 263.01±                 | 323.68±3            | 489.49±                 | 472.03±7            | 19.21±            | 24.69±            | 30.92±                | 68.96±                 |

|   |             |          |          |          |          |          |          |         |         |         |         |
|---|-------------|----------|----------|----------|----------|----------|----------|---------|---------|---------|---------|
| 2 | nal-D       | 42c      | 7.19c    | 28.58b   | 4.64b    | 91.53a   | 3.36a    | 3.75c   | 1.98c   | 4.34c   | 4.97c   |
| 3 | Unknown-4   | 67.32±5. | 138.87±  | 196.53±  | 435.98±1 | 377.23±  | 745.67±2 | 94.89±  | 100.89  | 111.92  | 52.78±  |
| 3 |             | 64fg     | 5.27e    | 20.60d   | 4.24b    | 38.56c   | 3.32a    | 5.66efg | ±3.58ef | ±2.86ef | 1.13g   |
| 3 | n-Hexanol-  | 59.00±5. | 157.05±  | 383.12±  | 368.33±1 | 651.51±  | 489.45±9 | 43.48±  | 49.63±  | 43.87±  | 48.40±  |
| 4 | M           | 57c      | 1.42c    | 75.98b   | 6.53b    | 21.53a   | 8.70b    | 2.19c   | 1.82c   | 4.58c   | 5.66c   |
| 3 | n-Hexanol-  | 10.04±1. | 15.72±1. | 81.98±3  | 95.12±5. | 264.23±  | 242.05±6 | 7.73±1. | 7.76±1. | 8.99±1. | 7.50±1. |
| 5 | D           | 06c      | 20c      | 1.32bc   | 49b      | 14.76a   | 1.75a    | 05c     | 32c     | 68c     | 64c     |
| 3 | Furfural-D  | 76.61±6. | 181.83±  | 116.26±  | 249.09±4 | 112.30±  | 445.62±5 | 40.67±  | 42.04±  | 39.03±  | 27.73±  |
| 6 |             | 25de     | 4.04bc   | 4.81cd   | 8.42b    | 6.47cd   | 7.60a    | 4.75de  | 3.86de  | 4.67de  | 5.15e   |
| 3 | (E)-2-hexe  | 27.52±3. | 53.66±2. | 83.78±1  | 110.00±1 | 127.76±  | 226.93±2 | 14.89±  | 11.48±  | 14.08±  | 19.49±  |
| 7 | nal-D       | 72ef     | 95de     | 0.10cd   | 0.99bc   | 17.71b   | 7.99a    | 2.42f   | 1.96f   | 1.89f   | 2.94ef  |
| 3 | Butyl       | 119.52±7 | 129.95±  | 170.68±  | 210.92±4 | 212.22±  | 242.73±2 | 33.71±  | 31.78±  | 35.67±  | 67.77±  |
| 8 | acetate-M   | .23d     | 1.83d    | 8.33c    | .21b     | 8.27b    | .18a     | 2.32f   | 1.99f   | 1.46f   | 3.22e   |
| 3 | 2-Methyl-1- | 79.71±7. | 59.73±4. | 99.18±1  | 129.03±6 | 124.78±  | 171.66±2 | 41.14±  | 41.99±  | 44.32±  | 38.70±  |
| 9 | pentanol-M  | 90cd     | 66de     | 6.15bc   | .74b     | 11.50b   | 3.62a    | 2.08f   | 1.20f   | 1.48f   | 2.47f   |
| 4 | Octanal     | 60.30±1. | 49.91±0. | 51.95±9. | 67.64±6. | 59.32±4. | 57.50±16 | 163.80  | 117.29  | 140.04  | 272.04  |
| 0 |             | 75d      | 87d      | 19d      | 67d      | 80d      | .00d     | ±1.95b  | ±0.83c  | ±3.61b  | ±20.00  |
|   |             |          |          |          |          |          |          |         |         | c       | a       |
| 4 | Unknown-5   | 34.38±3. | 33.39±3. | 37.54±3. | 37.84±2. | 37.33±2. | 49.42±2. | 549.68  | 578.35  | 271.54  | 33.75±  |
| 1 |             | 57c      | 08c      | 34c      | 32c      | 24c      | 15c      | ±35.74  | ±12.39  | ±12.76  | 6.02c   |
|   |             |          |          |          |          |          |          | a       | a       | b       |         |
| 4 | Methyl-5-h  | 19.66±1. | 14.80±0. | 17.24±2. | 21.36±3. | 26.78±1. | 21.15±1. | 168.53  | 101.81  | 132.11  | 114.82  |
| 2 | epten-2-one | 62e      | 72e      | 10e      | 22e      | 98e      | 82e      | ±6.90a  | ±1.52d  | ±9.67b  | ±3.52c  |
| 4 | 3-Ethylpyri | 80.01±15 | 52.74±1  | 39.83±1  | 22.96±2. | 25.40±4. | 18.75±1. | 78.03±  | 96.22±  | 48.39±  | 7.67±1. |
| 3 | dine        | .51a     | 0.14bc   | 8.10cde  | 63def    | 57cdef   | 22ef     | 4.41ab  | 4.60a   | 3.56cd  | 13f     |
| 4 | 1-Octen-3-o | 112.06±5 | 74.90±2. | 68.60±7. | 82.46±3. | 103.42±  | 93.74±6. | 26.39±  | 23.24±  | 31.17±  | 75.49±  |
| 4 | ne          | .94a     | 61d      | 96d      | 19cd     | 9.89ab   | 26bc     | 1.87e   | 2.78e   | 0.93e   | 1.79d   |
| 4 | Unknown-6   | 900.22±7 | 569.44±  | 732.91±  | 907.31±3 | 824.09±  | 989.54±1 | 19.72±  | 21.07±  | 21.00±  | 23.39±  |
| 5 |             | 2.05a    | 44.23b   | 146.97a  | 3.19a    | 69.82ab  | 88.22a   | 4.98f   | 4.93f   | 5.00f   | 4.19f   |
|   |             |          |          | b        |          |          |          |         |         |         |         |
| 4 | Unknown-7   | 94.40±0. | 135.68±  | 91.13±4. | 117.84±3 | 101.47±  | 110.07±9 | 48.45±  | 40.16±  | 45.05±  | 252.17  |
| 6 |             | 79d      | 2.97b    | 40d      | .45bc    | 8.39cd   | .67cd    | 3.69e   | 1.30e   | 2.55e   | ±14.04  |
|   |             |          |          |          |          |          |          |         |         |         | a       |
| 4 | Dimethyl    | 1212.54± | 43.57±1. | 480.13±  | 52.14±3. | 60.25±6. | 77.64±6. | 1039.0  | 1165.3  | 898.34  | 135.80  |
| 7 | disulfide   | 88.71a   | 05e      | 29.66d   | 87e      | 07e      | 30e      | 4±12.9  | 4±4.57  | ±8.86c  | ±11.10  |
|   |             |          |          |          |          |          |          | 4b      | a       |         | c       |
| 4 | Methanedit  | 339.27±4 | 350.30±  | 314.07±  | 250.62±7 | 214.59±  | 311.56±5 | 13.62±  | 10.05±  | 15.22±  | 15.36±  |
| 8 | hiol        | 8.80ab   | 10.90a   | 51.53ab  | .17bc    | 9.45c    | 1.66ab   | 1.12d   | 2.41d   | 2.33d   | 3.20d   |
| 4 | (E)-3-pente | 263.63±2 | 140.55±  | 322.13±  | 616.49±2 | 542.88±  | 995.39±2 | 95.94±  | 119.53  | 91.80±  | 61.96±  |
| 9 | n-2-one     | 8.92cd   | 6.94d    | 74.48cd  | 3.37b    | 56.19bc  | 69.99a   | 11.10d  | ±1.54d  | 0.82d   | 2.58d   |
| 5 | Pentan-1-ol | 170.56±1 | 525.63±  | 657.20±  | 424.68±1 | 840.45±  | 540.40±8 | 18.54±  | 19.06±  | 18.69±  | 23.56±  |
| 0 |             | 3.90e    | 10.55c   | 63.22b   | 2.36d    | 49.90a   | .00c     | 4.42f   | 4.86f   | 4.85f   | 5.97f   |
| 5 | 3-Methyl-2- | 60.74±1. | 44.09±0. | 47.29±7. | 60.47±0. | 47.13±3. | 62.49±9. | 29.54±  | 28.58±  | 30.25±  | 17.65±  |

|   |             |          |              |              |          |              |          |              |              |              |              |
|---|-------------|----------|--------------|--------------|----------|--------------|----------|--------------|--------------|--------------|--------------|
| 1 | butenal-M   | 88ab     | 62c          | 97bc         | 98ab     | 31bc         | 68a      | 1.49d        | 1.78d        | 2.04d        | 1.55d        |
| 5 | 3-Methylbu  | 391.74±7 | 591.83±      | 916.28±      | 663.29±2 | 1107.61      | 702.73±2 | 20.98±       | 15.13±       | 20.32±       | 17.93±       |
| 2 | tan-1-ol-D  | 9.46d    | 12.98c       | 101.16b      | .42c     | ±73.74a      | 6.14c    | 3.89e        | 1.99e        | 1.92e        | 1.33e        |
| 5 | Butyl       | 12.01±0. | 52.89±2.     | 34.65±2.     | 77.43±10 | 33.11±4.     | 38.30±1. | 5.22±1.      | 5.64±1.      | 7.11±1.      | 6.87±2.      |
| 3 | acetate-D   | 92d      | 90b          | 17c          | .01a     | 42c          | 98c      | 04d          | 87d          | 12d          | 67d          |
| 5 | 2-Methyl-1- | 18.42±1. | 21.78±2.     | 36.38±4.     | 40.53±4. | 52.44±7.     | 75.20±11 | 20.08±       | 19.78±       | 20.37±       | 13.60±       |
| 4 | pentanol-D  | 13c      | 12de         | 93cd         | 68bc     | 33b          | .49a     | 2.67e        | 1.06e        | 2.04e        | 1.00e        |
| 5 | 3-Methyl-2- | 81.43±5. | 52.63±2.     | 75.13±1      | 76.17±1. | 56.85±6.     | 102.57±3 | 7.43±0.      | 8.79±0.      | 9.96±1.      | 15.85±       |
| 5 | butenal-D   | 08ab     | 15b          | 6.42ab       | 85ab     | 54b          | 2.82a    | 27c          | 86c          | 82c          | 3.75c        |
| 5 | 3-Methylbu  | 53.20±4. | 88.17±6.     | 139.59±      | 104.54±0 | 132.76±      | 90.52±20 | 27.33±       | 19.89±       | 30.52±       | 35.52±       |
| 6 | tan-1-ol-M  | 10c      | 12b          | 16.45a       | .16b     | 7.38a        | .47b     | 1.88cd       | 1.88d        | 3.07cd       | 2.66cd       |
| 5 | 3-Hydroxyb  | 382.43±7 | 261.94±      | 218.87±      | 140.31±3 | 132.56±      | 163.58±4 | 16.36±       | 16.47±       | 12.74±       | 11.03±       |
| 7 | utan-2-one  | 9.62a    | 11.26b       | 63.81bc      | .23c     | 4.93c        | 7.76bc   | 2.05d        | 0.98d        | 1.40d        | 1.16d        |
| 5 | 3-Pentanol- | 1047.13± | 1437.64      | 1062.02      | 1236.07± | 1053.83      | 1119.73± | 17.85±       | 16.12±       | 15.72±       | 213.51       |
| 8 | D           | 28.56c   | ±56.04a      | ±84.19c      | 20.39b   | ±55.02c      | 10.82c   | 2.23e        | 1.14e        | 2.09e        | ±20.96<br>d  |
| 5 | 2-Methylbu  | 1720.30± | 2178.78      | 1668.37      | 1871.52± | 1784.22      | 1744.87± | 60.93±       | 51.11±       | 193.35       | 737.99       |
| 9 | tanal-D     | 67.75b   | ±48.23a      | ±110.67<br>b | 29.66b   | ±87.06b      | 123.04b  | 7.14d        | 3.11d        | ±6.47d       | ±61.36<br>c  |
| 6 | 1-Propaneth | 304.35±7 | 308.96±      | 368.94±      | 263.74±9 | 506.33±      | 408.44±1 | 14.19±       | 11.57±       | 15.05±       | 10.89±       |
| 0 | iol         | .10bc    | 15.62bc      | 32.98bc      | .76c     | 11.65a       | 12.13ab  | 1.34d        | 2.45d        | 1.47d        | 2.76d        |
| 6 | Butanal     | 2682.47± | 2409.04      | 2081.47      | 4111.36± | 3568.64      | 4146.59± | 25.59±       | 21.05±       | 29.04±       | 67.72±       |
| 1 |             | 518.61b  | ±178.95<br>b | ±241.56<br>b | 53.03a   | ±166.36<br>a | 247.11a  | 5.47c        | 4.91c        | 6.09c        | 12.81c       |
| 6 | 3-Methylbu  | 898.04±9 | 2306.82      | 1336.14      | 1994.18± | 1594.98      | 1501.35± | 36.41±       | 27.54±       | 139.93       | 552.40       |
| 2 | tanal-D     | 5.95d    | ±17.47a      | ±128.46<br>c | 62.13b   | ±59.03c      | 211.00c  | 3.38f        | 2.98f        | ±3.26f       | ±19.94<br>e  |
| 6 | Pentan-2-ol | 68.58±5. | 214.00±      | 66.41±8.     | 132.10±4 | 72.56±7.     | 159.22±3 | 4.93±1.      | 4.42±0.      | 5.35±0.      | 6.10±0.      |
| 3 |             | 85c      | 14.11a       | 09c          | .48b     | 72c          | 7.33b    | 54d          | 84d          | 80d          | 77d          |
| 6 | Ethyl       | 235.71±1 | 367.44±      | 197.08±      | 284.48±0 | 242.72±      | 444.39±5 | 260.87       | 358.56       | 434.89       | 80.93±       |
| 4 | Acetate     | 2.81cd   | 11.77ab      | 6.59d        | .19c     | 5.82cd       | 4.83a    | ±38.20<br>cd | ±5.62b       | ±35.11<br>ab | 8.47e        |
| 6 | 2-Butanone  | 1536.93± | 1608.96      | 3101.44      | 3303.74± | 3755.98      | 3877.80± | 80.32±       | 71.38±       | 104.49       | 96.09±       |
| 5 |             | 57.85c   | ±26.59c      | ±167.82<br>b | 59.80b   | ±63.39a      | 104.91a  | 2.24d        | 3.00d        | ±4.52d       | 6.17d        |
| 6 | 3-Pentanol- | 325.80±6 | 262.62±      | 322.69±      | 226.00±1 | 267.70±      | 191.43±1 | 81.76±       | 76.89±       | 48.93±       | 381.82       |
| 6 | M           | .50b     | 11.35c       | 6.17b        | .17d     | 6.10c        | 5.30e    | 3.21f        | 4.52f        | 0.87f        | ±26.90<br>a  |
| 6 | 2-Methylbu  | 67.66±12 | 81.20±6.     | 90.42±9.     | 45.27±1. | 60.67±6.     | 32.05±6. | 82.7±2       | 97.07±       | 81.82±       | 282.46       |
| 7 | tanal-M     | .79cd    | 52bc         | 57b          | 54ef     | 97de         | 42f      | 2.36bc       | 1.30b        | 1.32bc       | ±4.60a       |
| 6 | 3-Methylbu  | 2325.54± | 235.76±      | 1271.08      | 390.72±3 | 681.00±      | 599.48±1 | 1620.9       | 1725.9       | 744.23       | 1216.5       |
| 8 | tanal-M     | 138.70a  | 6.40f        | ±183.12<br>c | 9.61ef   | 37.71de      | 85.74de  | 8±19.1<br>7b | 7±35.0<br>2b | ±6.22d       | 6±30.4<br>8c |
| 6 | 1-Penten-3- | 46.99±2. | 65.36±1.     | 67.87±6.     | 76.19±4. | 126.86±      | 90.09±11 | 18.51±       | 13.70±       | 20.66±       | 13.29±       |



|   |                   |          |         |         |          |         |          |        |        |        |        |
|---|-------------------|----------|---------|---------|----------|---------|----------|--------|--------|--------|--------|
| 9 | one               | 45d      | 36c     | 56c     | 06c      | 3.25a   | .82b     | 0.63e  | 0.31e  | 0.30e  | 0.57e  |
| 7 | Oct-1-en-3-<br>ol | 133448.7 | 9998.93 | 11452.8 | 10429.96 | 10916.6 | 10998.83 | 98.42± | 114.65 | 111.56 | 123.19 |
| 0 |                   | 9±108.23 | ±123.24 | 2±419.9 | ±138.46c | 1±68.99 | ±527.14b | 22.00e | ±14.83 | ±17.34 | ±20.26 |
|   |                   | a        | d       | 9b      | d        | bc      | c        |        | e      | e      | e      |

Each value is expressed as the mean ± standard deviation. Means with different lowercase letters within a row indicate significant differences ( $p<0.05$ ).
